# Supplementary material for: Cloud condensation nuclei (CCN) from fresh and aged air pollution in the megacity region of Beijing
Source: Copernicus journal article supplement (doi:10.5194/acp-11-11023-2011), 2011-11-08
Supplement: Supplementary file 1 [file acp-11-11023-2011-supplement.pdf]

**Supplementary material for manuscript acp-2011-85:  
Cloud condensation nuclei (CCN) from fresh and aged air pollution in the  
megacity region of Beijing**

S. S. Gunthe<sup>1,\*</sup>, D. Rose<sup>1</sup>, H. Su<sup>1</sup>, R. M. Garland<sup>1,\*\*</sup>, P. Achtert<sup>2</sup>, A. Nowak<sup>2</sup>, A. Wiedensohler<sup>2</sup>, M. Kuwata<sup>3,\*\*\*</sup>, N. Takegawa<sup>3</sup>, Y. Kondo<sup>3</sup>, M. Hu<sup>4</sup>, M. Shao<sup>4</sup>, T. Zhu<sup>4</sup>, M. O. Andreae<sup>1</sup>, and U. Pöschl<sup>1</sup>

(1) Biogeochemistry Department, Max Planck Institute for Chemistry, Mainz, Germany

(2) Leibniz Institute for Tropospheric Research, Leipzig, Germany

(3) RCAST, University of Tokyo, Tokyo, Japan

(4) State Key Joint Laboratory of Environmental Simulation and Pollution Control, College of Environmental Sciences and Engineering, Peking University, Beijing, China

\* now at: EWRE Division, Department of Civil Engineering, Indian Institute of Technology  
Madras, Chennai, India

\*\* now at: Natural Resources and the Environment, Council for Scientific and Industrial  
Research, Pretoria, South Africa

\*\*\* now at: School of Engineering and Applied Sciences, Harvard University, Cambridge,  
Massachusetts, USA

Correspondence to: S. S. Gunthe (s.gunthe@iitm.ac.in)

**Table S1:** Characteristic CCN parameters (median values) listed for the entire campaign, for the focus periods of aged regional pollution and of fresh city pollution: midpoint activation diameters ( $D_a$ ,  $D_t$ ), maximum activated fractions ( $MAF_t$ ,  $MAF_m$ ), CDF standard deviations ( $\sigma_a$ ,  $\sigma_t$ ), heterogeneity parameters ( $\sigma_a/D_a$ ,  $\sigma_t/D_t$ ), hygroscopicity parameters ( $\kappa_a$ ,  $\kappa_t$ ), number concentrations of total aerosol particles ( $N_{CN,tot}$ ) and with  $D > 30$  nm ( $N_{CN,30}$ ), number concentrations of cloud condensation nuclei ( $N_{CCN,S}$ ), integral CCN efficiencies ( $N_{CCN,S}/N_{CN,tot}$ ,  $N_{CCN,S}/N_{CN,30}$ ),  $n_{ES}$  are the numbers of averaged CCN efficiency spectra. Subscripts a and t stand for parameters derived from 3-parameter and 2-parameter CDF fits to the measured CCN efficiency spectra, respectively.

| S [%]                   | $D_a$ [nm] | $D_t$ [nm] | $MAF_t$ | $MAF_m$ | $\sigma_a$ [nm] | $\sigma_t$ [nm] | $\sigma_a/D_a$ | $\sigma_t/D_t$ | $\kappa_a$  | $\kappa_t$  | $N_{CN,tot}$<br>[ $10^3 \text{ cm}^{-3}$ ] | $N_{CN,30}$<br>[ $10^3 \text{ cm}^{-3}$ ] | $N_{CCN,S}$<br>[ $10^3 \text{ cm}^{-3}$ ] | $N_{CCN,S}/N_{CN,tot}$ | $N_{CCN,S}/N_{CN,30}$ | $n_{ES}$    |
|-------------------------|------------|------------|---------|---------|-----------------|-----------------|----------------|----------------|-------------|-------------|--------------------------------------------|-------------------------------------------|-------------------------------------------|------------------------|-----------------------|-------------|
| Entire campaign         |            |            |         |         |                 |                 |                |                |             |             |                                            |                                           |                                           |                        |                       |             |
| 0.07                    | 190.4      | 196.5      | 0.84    | 0.85    | 10.4            | 25.3            | 0.055          | 0.128          | 0.47        | 0.43        | 13.59                                      | 11.13                                     | 1.54                                      | 0.11                   | 0.14                  | 269         |
| 0.26                    | 85.0       | 87.0       | 0.92    | 0.93    | 6.6             | 9.0             | 0.077          | 0.111          | 0.32        | 0.30        | 14.16                                      | 11.00                                     | 5.58                                      | 0.44                   | 0.52                  | 285         |
| 0.46                    | 61.5       | 61.9       | 0.95    | 0.96    | 4.9             | 5.1             | 0.077          | 0.082          | 0.28        | 0.27        | 14.27                                      | 11.10                                     | 7.23                                      | 0.59                   | 0.70                  | 271         |
| 0.66                    | 51.5       | 52.3       | 0.95    | 0.97    | 5.0             | 6.1             | 0.096          | 0.117          | 0.23        | 0.22        | 14.00                                      | 11.07                                     | 7.94                                      | 0.67                   | 0.78                  | 278         |
| 0.86                    | 44.1       | 44.4       | 0.97    | 0.98    | 4.7             | 4.9             | 0.103          | 0.110          | 0.22        | 0.21        | 14.03                                      | 11.10                                     | 9.34                                      | 0.75                   | 0.86                  | 269         |
| All                     |            |            |         |         |                 |                 | <b>0.080</b>   | <b>0.110</b>   | <b>0.30</b> | <b>0.28</b> | <b>14.00</b>                               | <b>11.00</b>                              |                                           |                        |                       | <b>1372</b> |
| Aged regional pollution |            |            |         |         |                 |                 |                |                |             |             |                                            |                                           |                                           |                        |                       |             |
| 0.07                    | 186.3      | 186.8      | 0.91    | 0.95    | 6.3             | 8.7             | 0.033          | 0.046          | 0.49        | 0.48        | 12.14                                      | 11.02                                     | 2.39                                      | 0.20                   | 0.22                  | 34          |
| 0.26                    | 81.2       | 82.9       | 0.96    | 0.96    | 6.6             | 8.2             | 0.084          | 0.101          | 0.37        | 0.35        | 12.41                                      | 11.37                                     | 7.29                                      | 0.61                   | 0.66                  | 33          |
| 0.46                    | 59.9       | 60.4       | 0.97    | 0.97    | 4.3             | 4.3             | 0.071          | 0.072          | 0.30        | 0.30        | 12.43                                      | 10.93                                     | 8.75                                      | 0.74                   | 0.81                  | 34          |
| 0.66                    | 49.3       | 50.3       | 0.95    | 0.97    | 4.5             | 5.2             | 0.091          | 0.102          | 0.26        | 0.25        | 11.87                                      | 10.86                                     | 9.31                                      | 0.82                   | 0.89                  | 34          |
| 0.86                    | 43.6       | 43.6       | 0.97    | 0.98    | 5.2             | 5.4             | 0.118          | 0.120          | 0.22        | 0.22        | 12.34                                      | 11.15                                     | 10.02                                     | 0.85                   | 0.93                  | 34          |
| All                     |            |            |         |         |                 |                 | <b>0.079</b>   | <b>0.093</b>   | <b>0.33</b> | <b>0.32</b> | <b>12.24</b>                               | <b>11.06</b>                              |                                           |                        |                       | <b>169</b>  |
| Fresh city pollution    |            |            |         |         |                 |                 |                |                |             |             |                                            |                                           |                                           |                        |                       |             |
| 0.07                    | 204.1      | 236.9      | 0.68    | 0.70    | 18.4            | 48.3            | 0.086          | 0.236          | 0.36        | 0.23        | 19.97                                      | 12.09                                     | 0.40                                      | 0.02                   | 0.03                  | 269         |
| 0.26                    | 95.3       | 105.6      | 0.91    | 0.92    | 14.6            | 28.3            | 0.144          | 0.263          | 0.23        | 0.17        | 20.05                                      | 11.17                                     | 2.08                                      | 0.12                   | 0.20                  | 285         |
| 0.46                    | 75.3       | 79.3       | 0.93    | 0.95    | 10.7            | 14.2            | 0.149          | 0.168          | 0.15        | 0.13        | 19.93                                      | 11.11                                     | 3.29                                      | 0.19                   | 0.33                  | 271         |
| 0.66                    | 58.2       | 59.8       | 0.95    | 0.96    | 9.3             | 10.3            | 0.155          | 0.181          | 0.160       | 0.15        | 19.73                                      | 11.18                                     | 4.41                                      | 0.30                   | 0.46                  | 278         |
| 0.86                    | 48.3       | 48.5       | 0.96    | 0.99    | 5.9             | 6.5             | 0.114          | 0.133          | 0.16        | 0.16        | 19.77                                      | 11.48                                     | 5.80                                      | 0.42                   | 0.56                  | 269         |
| All                     |            |            |         |         |                 |                 | <b>0.128</b>   | <b>0.190</b>   | <b>0.21</b> | <b>0.16</b> | <b>19.88</b>                               | <b>11.41</b>                              |                                           |                        |                       | <b>181</b>  |

**Table S2:** Best-fit parameters of monomodal lognormal size distribution functions fitted to the median size distribution of aerosol particles (CN) for the entire campaign, the focus periods (aged regional pollution, fresh city pollution), and the median number size distribution observed during PRIDE-PRD2006 (entire campaign excluding biomass burning episode, Rose et al., 2010): integral number concentration ( $N_{\text{CN}}$ ), count median or geometric mean diameter ( $D_g$ ), and geometric standard deviation ( $\sigma_g$ ).

| <b>Period</b>           | $N_{\text{CN}}$ [ $\text{cm}^{-3}$ ] | $D_g$ [nm] | $\sigma_g$ |
|-------------------------|--------------------------------------|------------|------------|
| Entire campaign         | 10200                                | 94         | 2.1        |
| Aged Regional Pollution | 10300                                | 125        | 1.9        |
| Fresh City Pollution    | 16100                                | 53         | 1.7        |
| PRIDE-PRD2006           | 18638                                | 68         | 1.9        |

**Table S3:** Mass concentrations and corresponding mass fractions of organic matter and inorganic ions determined by aerosol mass spectrometry (AMS). Apparent elemental and organic carbon (EC, OC) mass concentrations determined by thermo-optical measurements and mass fractions of EC and OC relative to the estimated total concentration of fine particulate matter ( $PM1 \approx \Sigma AMS + EC$ ). Median values are listed for the entire campaign and for the focus periods of aged regional pollution and of fresh city pollution.

| Compound          | Mass Concentration ( $\mu\text{g m}^{-3}$ ) |                         |                      | Mass Fraction   |                         |                      |
|-------------------|---------------------------------------------|-------------------------|----------------------|-----------------|-------------------------|----------------------|
|                   | Entire Campaign                             | Aged Regional Pollution | Fresh City Pollution | Entire Campaign | Aged Regional Pollution | Fresh City Pollution |
| Organics          | 9.78                                        | 14.08                   | 5.83                 | 0.374           | 0.301                   | 0.720                |
| $SO_4^{2-}$       | 7.93                                        | 17.83                   | 0.98                 | 0.303           | 0.382                   | 0.121                |
| $NH_4^+$          | 5.24                                        | 8.29                    | 0.59                 | 0.200           | 0.177                   | 0.073                |
| $NO_3^-$          | 2.68                                        | 5.28                    | 0.55                 | 0.102           | 0.113                   | 0.068                |
| $Cl^-$            | 0.54                                        | 1.22                    | 0.15                 | 0.021           | 0.026                   | 0.018                |
| $\Sigma AMS$      | 26.2                                        | 46.7                    | 8.1                  | 1.00            | 1.00                    | 1.00                 |
| EC                | 4.3                                         | 4.7                     | 2.1                  | 0.14            | 0.09                    | 0.21                 |
| OC                | 5.7                                         | 6.4                     | 3.6                  | 0.19            | 0.12                    | 0.35                 |
| $\Sigma AMS + EC$ | 30.5                                        | 51.4                    | 10.2                 | 1.00            | 1.00                    | 1.00                 |

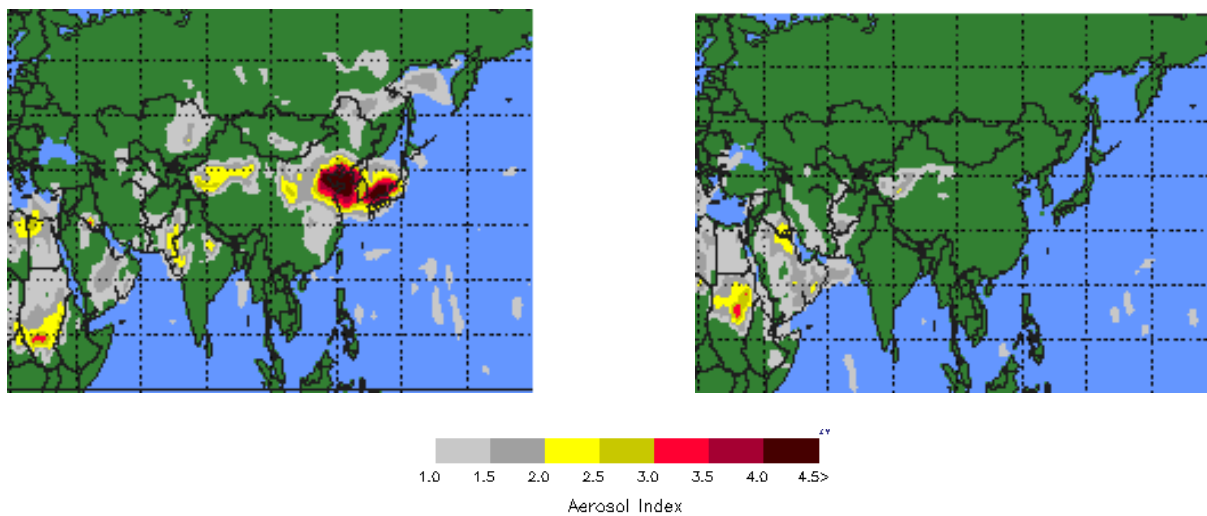

**Figure S1.** Total Ozone Mapping Spectrometer (TOMS) aerosol index images showing extraordinary dust event over Beijing on 17<sup>th</sup> April 2006 (left panel). No such event was observed during the fresh city pollution episode (right panel is representing 20<sup>th</sup> Aug 2006) of the present study confirming the absence of a dust event.
